# Supplementary material for: Evanescent scattering imaging of single protein binding kinetics and DNA conformation changes
Source: PubMed Central journal article supplement (PMC9051210; doi:10.1038/s41467-022-30046-8), 2022-04-28
Supplement: 41467_2022_30046_MOESM3_ESM.pdf [file 41467_2022_30046_MOESM3_ESM.pdf]

**Title:** Supplementary Video 1:

**Description:** Dynamic binding process of single proteins over time in the same grayscale.

**Title:** Supplementary Video 2:

**Description:** Exposure of anti-IgA modified sensor surface to IgA, Tg, and IgM proteins.

**Title:** Supplementary Video 3:

**Description:** Behaviours of one IgM molecule absorbed on the anti-IgM modified sensor surface.
